# Supplementary material
Source: Springer Nature journal article supplement (https://www.springermedizin.de/resource/supplementary/12872_2014_779_MOESM1_ESM.pdf/9430490)

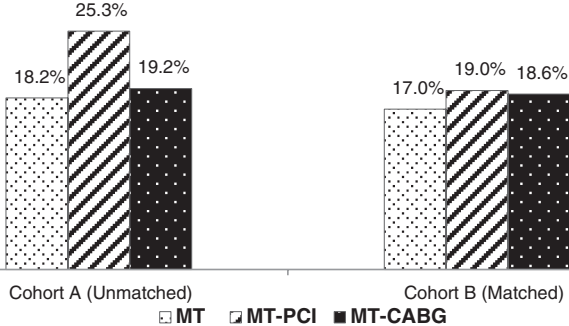

Supplement: MOESM1 [file 9430490]
